# Supplementary material
Source: MDPI journal article supplement (https://www.mdpi.com/2673-6004/3/4/22)
Supplement: s1 [file s1]

Archive with 2 entries (2 files):
- SupplementalTables2_to_5.xlsx
- Supplemental_TableS1S6_FigS1_to_S5.pdf
