# Supplementary material
Source: MDPI journal article supplement (https://www.mdpi.com/2673-6004/3/4/22)
Supplement: s1 [file s1 › SupplementalTables2_to_5.xlsx]

## Sheet: TableS2
Table S2: Overview of sampling dates, whether data were recorded separately for each TSE pond, and which analyses the observation dates were included with.
		Analyses where these data were used
Date	Resolution	Community composition and diversity before versus after rehabilitation (Figure 3)	Changes in diversity and composition after time, following rehabilitation only (Figures 4, ###)	individual abundance per species (whole-site change between years; Figure 5, Table 5)	change in individual abundance per species and in bird community between years among TSE pools (Figure 7,8)	species accumulation among pools (Figure 8,9)	Whittaker’s alpha, beta, and gamma diversity (morning surveys)	Whittaker’s alpha, beta, and gamma diversity (afternoon surveys)
2019-10-10	Whole site		yes	yes
2019-10-16	Whole site		yes	yes
2019-10-19	Whole site		yes	yes
2019-11-08	Whole site		yes	yes
2019-11-30	Whole site		yes	yes
2019-12-05	Whole site	yes	yes	yes
2019-12-07	Whole site	yes	yes	yes
2020-01-04	Whole site		yes
2020-01-06	Whole site		yes
2020-01-10	Whole site		yes
2020-01-18	Whole site		yes
2020-05-29	Whole site		yes	yes
2020-06-05	Whole site		yes	yes
2020-06-14	Whole site		yes	yes
2020-06-20	Whole site		yes	yes
2020-06-27	Whole site		yes	yes
2020-06-28	Whole site		yes	yes
2020-07-03	Whole site		yes
2020-07-10	Per TSE		yes			yes
2020-07-17	Per TSE		yes			yes
2020-07-24	Per TSE		yes			yes
2020-07-31	Per TSE		yes			yes
2020-08-07	Per TSE		yes			yes
2020-08-14	Per TSE		yes			yes
2020-08-21	Per TSE		yes			yes
2020-08-28	Per TSE		yes			yes
2020-09-04	Per TSE	yes	yes	yes	yes	yes
2020-09-11	Per TSE	yes	yes	yes	yes	yes		yes
2020-09-16	Per TSE	yes	yes	yes	yes	yes	yes
2020-09-18	Per TSE	yes	yes	yes	yes	yes		yes
2020-09-25	Per TSE	yes	yes	yes	yes	yes	yes
2020-09-30	Per TSE	yes	yes	yes	yes	yes	yes
2020-10-12	Per TSE		yes	yes		yes
2020-11-06	Per TSE		yes	yes		yes
2020-11-23	Per TSE		yes	yes		yes
2020-11-28	Per TSE		yes	yes		yes
2020-12-05	Per TSE	yes	yes	yes		yes
2020-12-11	Per TSE	yes	yes	yes		yes
2020-12-14	Per TSE	yes	yes	yes		yes
2020-12-24	Per TSE	yes	yes	yes		yes
2021-03-02	Per TSE		yes			yes
2021-05-08	Per TSE		yes	yes		yes
2021-06-12	Per TSE		yes	yes		yes
2021-06-30	Per TSE		yes	yes		yes
2021-09-02	Per TSE	yes	yes	yes	yes	yes		yes
2021-09-03	Per TSE	yes	yes	yes	yes	yes	yes
2021-09-09	Per TSE	yes	yes	yes	yes	yes
2021-09-10	Per TSE	yes	yes	yes	yes	yes
2021-09-11	Per TSE	yes	yes	yes	yes	yes
2021-09-16	Per TSE	yes	yes	yes	yes	yes		yes
2021-09-17	Per TSE	yes	yes	yes	yes	yes	yes
2021-09-23	Per TSE	yes	yes	yes	yes	yes
2021-09-24	Per TSE	yes	yes	yes	yes	yes	yes

## Sheet: TableS3
Table S3: Number of individuals and changes in abundance, comparing averages from two consecutive years, within months. Data from the entire site was combined. Data support Figure 6 in the main text. Latin names from the IOC 11.2 are considered the correct name; names used in the phylogeny of BirdTree.org are also provided for convenience.
Common name	Latin Name (IOC 11.2)	Month	Years compared	Difference in mean abundance (2021-2020 or 2020-2019)	Habitat type	breeding	Latin name (BirdTree.org version)	Older common name used in some data files
African Swamphen	Porphyrio madagascariensis	June	2020 and 2021	2	aquatic	breeder	Porphyrio porphyrio
African Swamphen	Porphyrio madagascariensis	September	2020 and 2021	0.0666667	aquatic	breeder	Porphyrio porphyrio
African Swamphen	Porphyrio madagascariensis	October	2019 and 2020	2	aquatic	breeder	Porphyrio porphyrio
African Swamphen	Porphyrio madagascariensis	December	2019 and 2020	1.5	aquatic	breeder	Porphyrio porphyrio
Barn Swallow	Hirundo rustica	May	2020 and 2021	14	terrestrial	nonbreeder	Hirundo rustica
Barn Swallow	Hirundo rustica	September	2020 and 2021	3.22222	terrestrial	nonbreeder	Hirundo rustica
Barn Swallow	Hirundo rustica	October	2019 and 2020	1	terrestrial	nonbreeder	Hirundo rustica
Barn Swallow	Hirundo rustica	December	2019 and 2020	-5	terrestrial	nonbreeder	Hirundo rustica
Black-crowned Night Heron	Nycticorax nycticorax	September	2020 and 2021	1.57143	aquatic	breeder	Nycticorax nycticorax
Black-crowned Night Heron	Nycticorax nycticorax	October	2019 and 2020	-12	aquatic	breeder	Nycticorax nycticorax
Black-crowned Sparrow-Lark	Eremopterix nigriceps	June	2020 and 2021	1.66667	terrestrial	breeder	Eremopterix nigriceps
Black-crowned Sparrow-Lark	Eremopterix nigriceps	September	2020 and 2021	3.33333	terrestrial	breeder	Eremopterix nigriceps
Black-headed Gull	Chroicocephalus ridibundus	October	2019 and 2020	-2	aquatic	nonbreeder	Larus ridibundus	Common Black-headed Gull
Black-headed Gull	Chroicocephalus ridibundus	November	2019 and 2020	2	aquatic	nonbreeder	Larus ridibundus	Common Black-headed Gull
Black-headed Gull	Chroicocephalus ridibundus	December	2019 and 2020	-0.75	aquatic	nonbreeder	Larus ridibundus	Common Black-headed Gull
Black-necked Grebe	Podiceps nigricollis	June	2020 and 2021	-1	aquatic	breeder	Podiceps nigricollis
Black-necked Grebe	Podiceps nigricollis	September	2020 and 2021	1	aquatic	breeder	Podiceps nigricollis
Black-necked Grebe	Podiceps nigricollis	November	2019 and 2020	-6	aquatic	breeder	Podiceps nigricollis
Black-necked Grebe	Podiceps nigricollis	December	2019 and 2020	-16.5	aquatic	breeder	Podiceps nigricollis
Black-tailed Godwit	Limosa limosa	October	2019 and 2020	-1	aquatic	nonbreeder	Limosa limosa
Black-tailed Godwit	Limosa limosa	November	2019 and 2020	-3	aquatic	nonbreeder	Limosa limosa
Black-tailed Godwit	Limosa limosa	December	2019 and 2020	-5	aquatic	nonbreeder	Limosa limosa
Black-winged stilt	Himantopus himantopus	May	2020 and 2021	1	aquatic	breeder	Himantopus himantopus
Black-winged stilt	Himantopus himantopus	June	2020 and 2021	-8.25	aquatic	breeder	Himantopus himantopus
Black-winged stilt	Himantopus himantopus	September	2020 and 2021	-26.0095	aquatic	breeder	Himantopus himantopus
Black-winged stilt	Himantopus himantopus	October	2019 and 2020	6	aquatic	breeder	Himantopus himantopus
Black-winged stilt	Himantopus himantopus	November	2019 and 2020	-54.3333	aquatic	breeder	Himantopus himantopus
Black-winged stilt	Himantopus himantopus	December	2019 and 2020	-30.4	aquatic	breeder	Himantopus himantopus
Caspian Gull	Larus cachinnans	November	2019 and 2020	2	aquatic	nonbreeder	Larus cachinnans	CaspSteppeGull
Caspian Gull	Larus cachinnans	December	2019 and 2020	2.2	aquatic	nonbreeder	Larus cachinnans	CaspSteppeGull
Caspian Tern	Hydroprogne caspia	September	2020 and 2021	1	aquatic	breeder	Sterna caspia
Caspian Tern	Hydroprogne caspia	December	2019 and 2020	1	aquatic	breeder	Sterna caspia
Clamorous reed warbler	Acrocephalus stentoreus	May	2020 and 2021	24.6667	aquatic	breeder	Acrocephalus stentoreus
Clamorous reed warbler	Acrocephalus stentoreus	June	2020 and 2021	3	aquatic	breeder	Acrocephalus stentoreus
Clamorous reed warbler	Acrocephalus stentoreus	September	2020 and 2021	-2.25	aquatic	breeder	Acrocephalus stentoreus
Clamorous reed warbler	Acrocephalus stentoreus	October	2019 and 2020	2	aquatic	breeder	Acrocephalus stentoreus
Clamorous reed warbler	Acrocephalus stentoreus	November	2019 and 2020	-1	aquatic	breeder	Acrocephalus stentoreus
Clamorous reed warbler	Acrocephalus stentoreus	December	2019 and 2020	5.2	aquatic	breeder	Acrocephalus stentoreus
Common Greenshank	Tringa nebularia	September	2020 and 2021	-2	aquatic	nonbreeder	Tringa nebularia
Common Greenshank	Tringa nebularia	November	2019 and 2020	3	aquatic	nonbreeder	Tringa nebularia
Common Greenshank	Tringa nebularia	December	2019 and 2020	15.5714	aquatic	nonbreeder	Tringa nebularia
Common Moorhen	Gallinula chloropus	May	2020 and 2021	-1	aquatic	breeder	Gallinula chloropus	Eurasian Moorhen
Common Moorhen	Gallinula chloropus	June	2020 and 2021	-3.06667	aquatic	breeder	Gallinula chloropus	Eurasian Moorhen
Common Moorhen	Gallinula chloropus	September	2020 and 2021	19.2381	aquatic	breeder	Gallinula chloropus	Eurasian Moorhen
Common Moorhen	Gallinula chloropus	October	2019 and 2020	1	aquatic	breeder	Gallinula chloropus	Eurasian Moorhen
Common Moorhen	Gallinula chloropus	November	2019 and 2020	5	aquatic	breeder	Gallinula chloropus	Eurasian Moorhen
Common Moorhen	Gallinula chloropus	December	2019 and 2020	-1.16667	aquatic	breeder	Gallinula chloropus	Eurasian Moorhen
Common Redshank	Tringa totanus	September	2020 and 2021	-1.5	aquatic	nonbreeder	Tringa totanus
Common Redshank	Tringa totanus	October	2019 and 2020	-2	aquatic	nonbreeder	Tringa totanus
Common Redshank	Tringa totanus	November	2019 and 2020	0	aquatic	nonbreeder	Tringa totanus
Common Redshank	Tringa totanus	December	2019 and 2020	5.625	aquatic	nonbreeder	Tringa totanus
Common Ringed Plover	Charadrius hiaticula	June	2020 and 2021	-1	aquatic	nonbreeder	Charadrius hiaticula
Common Ringed Plover	Charadrius hiaticula	September	2020 and 2021	-1.91667	aquatic	nonbreeder	Charadrius hiaticula
Common Ringed Plover	Charadrius hiaticula	October	2019 and 2020	4	aquatic	nonbreeder	Charadrius hiaticula
Common Ringed Plover	Charadrius hiaticula	November	2019 and 2020	5	aquatic	nonbreeder	Charadrius hiaticula
Common Ringed Plover	Charadrius hiaticula	December	2019 and 2020	0.785714	aquatic	nonbreeder	Charadrius hiaticula
Common Sandpiper	Actitis hypoleucos	September	2020 and 2021	-2.23232	aquatic	nonbreeder	Actitis hypoleucos
Common Sandpiper	Actitis hypoleucos	November	2019 and 2020	-3.4	aquatic	nonbreeder	Actitis hypoleucos
Common Sandpiper	Actitis hypoleucos	December	2019 and 2020	-47.125	aquatic	nonbreeder	Actitis hypoleucos
Common Snipe	Gallinago gallinago	September	2020 and 2021	-0.714286	aquatic	nonbreeder	Gallinago gallinago
Common Snipe	Gallinago gallinago	October	2019 and 2020	1	aquatic	nonbreeder	Gallinago gallinago
Common Snipe	Gallinago gallinago	November	2019 and 2020	3	aquatic	nonbreeder	Gallinago gallinago
Common Snipe	Gallinago gallinago	December	2019 and 2020	2.66667	aquatic	nonbreeder	Gallinago gallinago
Common Tern	Sterna hirundo	September	2020 and 2021	1	aquatic	nonbreeder	Sterna hirundo
Crested Lark	Galerida cristata	May	2020 and 2021	3	terrestrial	breeder	Galerida cristata
Crested Lark	Galerida cristata	June	2020 and 2021	-2.6	terrestrial	breeder	Galerida cristata
Crested Lark	Galerida cristata	September	2020 and 2021	-1.03846	terrestrial	breeder	Galerida cristata
Crested Lark	Galerida cristata	October	2019 and 2020	1	terrestrial	breeder	Galerida cristata
Crested Lark	Galerida cristata	November	2019 and 2020	1.75	terrestrial	breeder	Galerida cristata
Crested Lark	Galerida cristata	December	2019 and 2020	-3.5	terrestrial	breeder	Galerida cristata
Curlew Sandpiper	Calidris ferruginea	September	2020 and 2021	-12.9444	aquatic	nonbreeder	Calidris ferruginea
Curlew Sandpiper	Calidris ferruginea	December	2019 and 2020	14.1538	aquatic	nonbreeder	Calidris ferruginea
Desert Wheatear	Oenanthe deserti	November	2019 and 2020	1	terrestrial	nonbreeder	Oenanthe deserti
Desert Wheatear	Oenanthe deserti	December	2019 and 2020	1	terrestrial	nonbreeder	Oenanthe deserti
Dunlin	Calidris alpina	September	2020 and 2021	-18.375	aquatic	nonbreeder	Calidris alpina
Dunlin	Calidris alpina	October	2019 and 2020	80	aquatic	nonbreeder	Calidris alpina
Dunlin	Calidris alpina	November	2019 and 2020	44	aquatic	nonbreeder	Calidris alpina
Dunlin	Calidris alpina	December	2019 and 2020	1.4	aquatic	nonbreeder	Calidris alpina
Eastern Black-eared Wheatear	Oenanthe melanoleuca	September	2020 and 2021	-3	terrestrial	nonbreeder	Oenanthe hispanica	Black-eared Wheatear
Eurasian Collared Dove	Streptopelia decaocto	May	2020 and 2021	3.33333	terrestrial	breeder	Streptopelia decaocto
Eurasian Collared Dove	Streptopelia decaocto	June	2020 and 2021	-33.4	terrestrial	breeder	Streptopelia decaocto
Eurasian Collared Dove	Streptopelia decaocto	September	2020 and 2021	-10.7667	terrestrial	breeder	Streptopelia decaocto
Eurasian Collared Dove	Streptopelia decaocto	October	2019 and 2020	17	terrestrial	breeder	Streptopelia decaocto
Eurasian Collared Dove	Streptopelia decaocto	November	2019 and 2020	1.5	terrestrial	breeder	Streptopelia decaocto
Eurasian Collared Dove	Streptopelia decaocto	December	2019 and 2020	7.6	terrestrial	breeder	Streptopelia decaocto
Eurasian Coot	Fulica atra	June	2020 and 2021	3	aquatic	breeder	Fulica atra
Eurasian Coot	Fulica atra	September	2020 and 2021	34	aquatic	breeder	Fulica atra
Eurasian Coot	Fulica atra	November	2019 and 2020	-1	aquatic	breeder	Fulica atra
Eurasian Coot	Fulica atra	December	2019 and 2020	-6.33333	aquatic	breeder	Fulica atra
Eurasian Curlew	Numenius arquata	September	2020 and 2021	1.5	aquatic	nonbreeder	Numenius arquata
Eurasian Hoopoe	Upupa epops	September	2020 and 2021	2	terrestrial	nonbreeder	Upupa epops
Ferruginous Duck	Aythya nyroca	June	2020 and 2021	1	aquatic	breeder	Aythya nyroca
Ferruginous Duck	Aythya nyroca	September	2020 and 2021	3.66667	aquatic	breeder	Aythya nyroca
Garganey	Spatula querquedula	June	2020 and 2021	1	aquatic	nonbreeder	Anas querquedula
Garganey	Spatula querquedula	September	2020 and 2021	-2.66667	aquatic	nonbreeder	Anas querquedula
Garganey	Spatula querquedula	October	2019 and 2020	1	aquatic	nonbreeder	Anas querquedula
Garganey	Spatula querquedula	November	2019 and 2020	1	aquatic	nonbreeder	Anas querquedula
Garganey	Spatula querquedula	December	2019 and 2020	2	aquatic	nonbreeder	Anas querquedula
Great Cormorant	Phalacrocorax carbo	June	2020 and 2021	3.5	aquatic	nonbreeder	Phalacrocorax carbo
Great Cormorant	Phalacrocorax carbo	September	2020 and 2021	3.5	aquatic	nonbreeder	Phalacrocorax carbo
Great Cormorant	Phalacrocorax carbo	October	2019 and 2020	-1	aquatic	nonbreeder	Phalacrocorax carbo
Great Cormorant	Phalacrocorax carbo	November	2019 and 2020	-46.6667	aquatic	nonbreeder	Phalacrocorax carbo
Great Cormorant	Phalacrocorax carbo	December	2019 and 2020	-17.4286	aquatic	nonbreeder	Phalacrocorax carbo
Great crested Grebe	Podiceps cristatus	May	2020 and 2021	80	aquatic	breeder	Podiceps cristatus
Great crested Grebe	Podiceps cristatus	June	2020 and 2021	17.8	aquatic	breeder	Podiceps cristatus
Great crested Grebe	Podiceps cristatus	September	2020 and 2021	3.86364	aquatic	breeder	Podiceps cristatus
Great crested Grebe	Podiceps cristatus	October	2019 and 2020	6	aquatic	breeder	Podiceps cristatus
Great crested Grebe	Podiceps cristatus	November	2019 and 2020	36.1667	aquatic	breeder	Podiceps cristatus
Great crested Grebe	Podiceps cristatus	December	2019 and 2020	32.3333	aquatic	breeder	Podiceps cristatus
Great Egret	Ardea alba	November	2019 and 2020	4	aquatic	nonbreeder	Casmerodius albus	Western Great Egret
Great Egret	Ardea alba	December	2019 and 2020	4	aquatic	nonbreeder	Casmerodius albus	Western Great Egret
Great Grey Shrike	Lanius excubitor	September	2020 and 2021	-0.5	terrestrial	breeder	Lanius excubitor	Grey shrike
Great Grey Shrike	Lanius excubitor	December	2019 and 2020	-1	terrestrial	breeder	Lanius excubitor	Grey shrike
Greater Flamingo	Phoenicopterus roseus	October	2019 and 2020	-42.3333	aquatic	nonbreeder	Phoenicopterus roseus
Greater Flamingo	Phoenicopterus roseus	November	2019 and 2020	5.5	aquatic	nonbreeder	Phoenicopterus roseus
Greater Flamingo	Phoenicopterus roseus	December	2019 and 2020	-40	aquatic	nonbreeder	Phoenicopterus roseus
Greater Hoopoe-Lark	Alaemon alaudipes	September	2020 and 2021	1	terrestrial	breeder	Alaemon alaudipes
Green Sandpiper	Tringa ochropus	September	2020 and 2021	0.583333	aquatic	nonbreeder	Tringa ochropus
Green Sandpiper	Tringa ochropus	October	2019 and 2020	-2	aquatic	nonbreeder	Tringa ochropus
Green Sandpiper	Tringa ochropus	November	2019 and 2020	1	aquatic	nonbreeder	Tringa ochropus
Green Sandpiper	Tringa ochropus	December	2019 and 2020	-10.5	aquatic	nonbreeder	Tringa ochropus
Grey Francolin	Ortygornis pondicerianus	June	2020 and 2021	1	terrestrial	breeder	Francolinus pondicerianus
Grey Francolin	Ortygornis pondicerianus	September	2020 and 2021	-2.66667	terrestrial	breeder	Francolinus pondicerianus
Grey Heron	Ardea cinerea	September	2020 and 2021	-12.3333	aquatic	nonbreeder	Ardea cinerea
Grey Heron	Ardea cinerea	October	2019 and 2020	1.5	aquatic	nonbreeder	Ardea cinerea
Grey Heron	Ardea cinerea	November	2019 and 2020	2.25	aquatic	nonbreeder	Ardea cinerea
Grey Heron	Ardea cinerea	December	2019 and 2020	2.22222	aquatic	nonbreeder	Ardea cinerea
Grey Wagtail	Motacilla cinerea	November	2019 and 2020	1	terrestrial	nonbreeder	Motacilla cinerea
House Sparrow	Passer domesticus	June	2020 and 2021	-18.8	terrestrial	breeder	Passer domesticus
House Sparrow	Passer domesticus	September	2020 and 2021	1.33333	terrestrial	breeder	Passer domesticus
House Sparrow	Passer domesticus	December	2019 and 2020	-50	terrestrial	breeder	Passer domesticus
Isabelline Shrike	Lanius isabellinus	December	2019 and 2020	-1	terrestrial	nonbreeder	Lanius isabellinus	Daurian Shrike
Kentish Plover	Charadrius alexandrinus	May	2020 and 2021	23	aquatic	breeder	Charadrius alexandrinus
Kentish Plover	Charadrius alexandrinus	June	2020 and 2021	-10.2	aquatic	breeder	Charadrius alexandrinus
Kentish Plover	Charadrius alexandrinus	September	2020 and 2021	-0.556818	aquatic	breeder	Charadrius alexandrinus
Kentish Plover	Charadrius alexandrinus	October	2019 and 2020	-17.5	aquatic	breeder	Charadrius alexandrinus
Kentish Plover	Charadrius alexandrinus	November	2019 and 2020	144.25	aquatic	breeder	Charadrius alexandrinus
Kentish Plover	Charadrius alexandrinus	December	2019 and 2020	315	aquatic	breeder	Charadrius alexandrinus
Laughing Dove	Spilopelia senegalensis	May	2020 and 2021	4	terrestrial	breeder	Stigmatopelia senegalensis
Laughing Dove	Spilopelia senegalensis	June	2020 and 2021	-2.6	terrestrial	breeder	Stigmatopelia senegalensis
Laughing Dove	Spilopelia senegalensis	September	2020 and 2021	1.01389	terrestrial	breeder	Stigmatopelia senegalensis
Laughing Dove	Spilopelia senegalensis	October	2019 and 2020	-1	terrestrial	breeder	Stigmatopelia senegalensis
Laughing Dove	Spilopelia senegalensis	November	2019 and 2020	2	terrestrial	breeder	Stigmatopelia senegalensis
Laughing Dove	Spilopelia senegalensis	December	2019 and 2020	0.5	terrestrial	breeder	Stigmatopelia senegalensis
Lesser black-backed Gull	Larus fuscus	September	2020 and 2021	-1	aquatic	nonbreeder	Larus fuscus
Lesser black-backed Gull	Larus fuscus	November	2019 and 2020	1	aquatic	nonbreeder	Larus fuscus
Lesser black-backed Gull	Larus fuscus	December	2019 and 2020	2.5	aquatic	nonbreeder	Larus fuscus
Lesser crested tern	Thalasseus bengalensis	September	2020 and 2021	-1	aquatic	nonbreeder	Sterna bengalensis
Lesser Sand Plover	Charadrius mongolus	May	2020 and 2021	-3	aquatic	nonbreeder	Charadrius mongolus
Lesser Sand Plover	Charadrius mongolus	June	2020 and 2021	-3	aquatic	nonbreeder	Charadrius mongolus
Lesser Sand Plover	Charadrius mongolus	December	2019 and 2020	-1	aquatic	nonbreeder	Charadrius mongolus
Little Egret	Egretta garzetta	September	2020 and 2021	-6.13986	aquatic	nonbreeder	Egretta garzetta
Little Egret	Egretta garzetta	October	2019 and 2020	1	aquatic	nonbreeder	Egretta garzetta
Little Egret	Egretta garzetta	November	2019 and 2020	11	aquatic	nonbreeder	Egretta garzetta
Little Egret	Egretta garzetta	December	2019 and 2020	15.7143	aquatic	nonbreeder	Egretta garzetta
Little Grebe	Tachybaptus ruficollis	May	2020 and 2021	15.3333	aquatic	breeder	Tachybaptus ruficollis
Little Grebe	Tachybaptus ruficollis	June	2020 and 2021	-4.4	aquatic	breeder	Tachybaptus ruficollis
Little Grebe	Tachybaptus ruficollis	September	2020 and 2021	48.2213	aquatic	breeder	Tachybaptus ruficollis
Little Grebe	Tachybaptus ruficollis	October	2019 and 2020	-1	aquatic	breeder	Tachybaptus ruficollis
Little Grebe	Tachybaptus ruficollis	November	2019 and 2020	-1.5	aquatic	breeder	Tachybaptus ruficollis
Little Grebe	Tachybaptus ruficollis	December	2019 and 2020	-6.4	aquatic	breeder	Tachybaptus ruficollis
Little Ringed Plover	Charadrius dubius	September	2020 and 2021	1	terrestrial	breeder	Charadrius dubius
Little Stint	Calidris minuta	May	2020 and 2021	1	aquatic	nonbreeder	Calidris minuta
Little Stint	Calidris minuta	June	2020 and 2021	-1	aquatic	nonbreeder	Calidris minuta
Little Stint	Calidris minuta	September	2020 and 2021	2.80114	aquatic	nonbreeder	Calidris minuta
Little Stint	Calidris minuta	October	2019 and 2020	-3.33333	aquatic	nonbreeder	Calidris minuta
Little Stint	Calidris minuta	November	2019 and 2020	48	aquatic	nonbreeder	Calidris minuta
Little Stint	Calidris minuta	December	2019 and 2020	21.7857	aquatic	nonbreeder	Calidris minuta
Little Tern	Sternula albifrons	June	2020 and 2021	-3	aquatic	nonbreeder	Sterna albifrons
Little Tern	Sternula albifrons	September	2020 and 2021	-4	aquatic	nonbreeder	Sterna albifrons
Mallard	Anas platyrhynchos	September	2020 and 2021	1	aquatic	nonbreeder	Anas platyrhynchos
Mallard	Anas platyrhynchos	December	2019 and 2020	-2	aquatic	nonbreeder	Anas platyrhynchos
Marsh Sandpiper	Tringa stagnatilis	June	2020 and 2021	3	aquatic	nonbreeder	Tringa stagnatilis
Marsh Sandpiper	Tringa stagnatilis	September	2020 and 2021	0.416667	aquatic	nonbreeder	Tringa stagnatilis
Marsh Sandpiper	Tringa stagnatilis	October	2019 and 2020	2	aquatic	nonbreeder	Tringa stagnatilis
Marsh Sandpiper	Tringa stagnatilis	November	2019 and 2020	1.25	aquatic	nonbreeder	Tringa stagnatilis
Marsh Sandpiper	Tringa stagnatilis	December	2019 and 2020	1.8	aquatic	nonbreeder	Tringa stagnatilis
Namaqua Dove	Oena capensis	June	2020 and 2021	-2.5	terrestrial	breeder	Oena capensis
Namaqua Dove	Oena capensis	September	2020 and 2021	-2.41667	terrestrial	breeder	Oena capensis
Namaqua Dove	Oena capensis	November	2019 and 2020	-4	terrestrial	breeder	Oena capensis
Northern Shoveler	Spatula clypeata	September	2020 and 2021	-0.5	aquatic	nonbreeder	Anas clypeata
Pied Avocet	Recurvirostra avosetta	May	2020 and 2021	-1	aquatic	breeder	Recurvirostra avosetta
Pied Avocet	Recurvirostra avosetta	June	2020 and 2021	-4.25	aquatic	breeder	Recurvirostra avosetta
Pied Avocet	Recurvirostra avosetta	September	2020 and 2021	-3	aquatic	breeder	Recurvirostra avosetta
Pied Avocet	Recurvirostra avosetta	October	2019 and 2020	-8.5	aquatic	breeder	Recurvirostra avosetta
Pied Avocet	Recurvirostra avosetta	November	2019 and 2020	-3	aquatic	breeder	Recurvirostra avosetta
Purple Heron	Ardea purpurea	September	2020 and 2021	0.5	aquatic	breeder	Ardea purpurea
Purple Heron	Ardea purpurea	October	2019 and 2020	-1	aquatic	breeder	Ardea purpurea
Purple Heron	Ardea purpurea	November	2019 and 2020	1	aquatic	breeder	Ardea purpurea
Purple Heron	Ardea purpurea	December	2019 and 2020	-1	aquatic	breeder	Ardea purpurea
Red-necked Phalarope	Phalaropus lobatus	September	2020 and 2021	-1.33333	aquatic	nonbreeder	Phalaropus lobatus
Red-necked Phalarope	Phalaropus lobatus	December	2019 and 2020	0	aquatic	nonbreeder	Phalaropus lobatus
Red-tailed Shrike	Lanius phoenicuroides	September	2020 and 2021	-1	terrestrial	nonbreeder	Lanius isabellinus
Red-tailed Shrike	Lanius phoenicuroides	December	2019 and 2020	1	terrestrial	nonbreeder	Lanius isabellinus
Red-wattled Lapwing	Vanellus indicus	May	2020 and 2021	0.666667	aquatic	breeder	Vanellus indicus
Red-wattled Lapwing	Vanellus indicus	June	2020 and 2021	-2.4	aquatic	breeder	Vanellus indicus
Red-wattled Lapwing	Vanellus indicus	September	2020 and 2021	-0.333333	aquatic	breeder	Vanellus indicus
Red-wattled Lapwing	Vanellus indicus	November	2019 and 2020	-1	aquatic	breeder	Vanellus indicus
Red-wattled Lapwing	Vanellus indicus	December	2019 and 2020	3	aquatic	breeder	Vanellus indicus
Rock Dove	Columba livia	June	2020 and 2021	-10.5	terrestrial	breeder	Columba livia
Rock Dove	Columba livia	September	2020 and 2021	-1.5	terrestrial	breeder	Columba livia
Rock Dove	Columba livia	November	2019 and 2020	-160	terrestrial	breeder	Columba livia
Rock Dove	Columba livia	December	2019 and 2020	1.8	terrestrial	breeder	Columba livia
Ruff	Calidris pugnax	September	2020 and 2021	0.666667	aquatic	nonbreeder	Philomachus pugnax
Ruff	Calidris pugnax	October	2019 and 2020	2	aquatic	nonbreeder	Philomachus pugnax
Ruff	Calidris pugnax	November	2019 and 2020	-1.5	aquatic	nonbreeder	Philomachus pugnax
Sand Martin	Riparia riparia	May	2020 and 2021	15	terrestrial	nonbreeder	Riparia riparia
Sand Martin	Riparia riparia	June	2020 and 2021	13	terrestrial	nonbreeder	Riparia riparia
Sand Martin	Riparia riparia	September	2020 and 2021	6.51538	terrestrial	nonbreeder	Riparia riparia
Sand Martin	Riparia riparia	October	2019 and 2020	7	terrestrial	nonbreeder	Riparia riparia
Saunders's Tern	Sternula saundersi	May	2020 and 2021	4	aquatic	breeder	Sterna saundersi
Saunders's Tern	Sternula saundersi	June	2020 and 2021	1.5	aquatic	breeder	Sterna saundersi
Saunders's Tern	Sternula saundersi	September	2020 and 2021	6.5	aquatic	breeder	Sterna saundersi
Slender-billed Gull	Chroicocephalus genei	September	2020 and 2021	-80.75	aquatic	nonbreeder	Larus genei
Slender-billed Gull	Chroicocephalus genei	November	2019 and 2020	13.3333	aquatic	nonbreeder	Larus genei
Slender-billed Gull	Chroicocephalus genei	December	2019 and 2020	0	aquatic	nonbreeder	Larus genei
Socotra Cormorant	Phalacrocorax nigrogularis	September	2020 and 2021	1	aquatic	breeder	Phalacrocorax nigrogularis
Socotra Cormorant	Phalacrocorax nigrogularis	November	2019 and 2020	-1	aquatic	breeder	Phalacrocorax nigrogularis
Socotra Cormorant	Phalacrocorax nigrogularis	December	2019 and 2020	-1	aquatic	breeder	Phalacrocorax nigrogularis
Song Thrush	Turdus philomelos	May	2020 and 2021	1.33333	terrestrial	nonbreeder	Turdus philomelos
Spanish Sparrow	Passer hispaniolensis	June	2020 and 2021	-2	terrestrial	breeder	Passer hispaniolensis
Spanish Sparrow	Passer hispaniolensis	November	2019 and 2020	7.5	terrestrial	breeder	Passer hispaniolensis
Spanish Sparrow	Passer hispaniolensis	December	2019 and 2020	-28.3333	terrestrial	breeder	Passer hispaniolensis
Spotted Flycatcher	Muscicapa striata	September	2020 and 2021	0	terrestrial	nonbreeder	Muscicapa striata
Spotted Redshank	Tringa erythropus	December	2019 and 2020	4	aquatic	nonbreeder	Tringa erythropus
Squacco Heron	Ardeola ralloides	September	2020 and 2021	0.488889	aquatic	breeder	Ardeola ralloides
Squacco Heron	Ardeola ralloides	October	2019 and 2020	-1	aquatic	breeder	Ardeola ralloides
Squacco Heron	Ardeola ralloides	November	2019 and 2020	2.5	aquatic	breeder	Ardeola ralloides
Squacco Heron	Ardeola ralloides	December	2019 and 2020	1.75	aquatic	breeder	Ardeola ralloides
Striated Heron	Butorides striata	May	2020 and 2021	1	aquatic	breeder	Butorides striata
Tawny Pipit	Anthus campestris	December	2019 and 2020	-1	terrestrial	nonbreeder	Anthus campestris
Temminck's Stint	Calidris temminckii	September	2020 and 2021	-1.5	aquatic	nonbreeder	Calidris temminckii
Temminck's Stint	Calidris temminckii	October	2019 and 2020	-3	aquatic	nonbreeder	Calidris temminckii
Temminck's Stint	Calidris temminckii	December	2019 and 2020	2	aquatic	nonbreeder	Calidris temminckii
Water Pipit	Anthus spinoletta	November	2019 and 2020	2.5	terrestrial	nonbreeder	Anthus spinoletta
Water Pipit	Anthus spinoletta	December	2019 and 2020	2.75	terrestrial	nonbreeder	Anthus spinoletta
Western Marsh Harrier	Circus aeruginosus	September	2020 and 2021	-0.238095	terrestrial	nonbreeder	Circus aeruginosus
Western Marsh Harrier	Circus aeruginosus	October	2019 and 2020	0	terrestrial	nonbreeder	Circus aeruginosus
Western Marsh Harrier	Circus aeruginosus	November	2019 and 2020	1.6	terrestrial	nonbreeder	Circus aeruginosus
Western Marsh Harrier	Circus aeruginosus	December	2019 and 2020	-1	terrestrial	nonbreeder	Circus aeruginosus
Western Osprey	Pandion haliaetus	May	2020 and 2021	1	aquatic	breeder	Pandion haliaetus	Osprey
Western Osprey	Pandion haliaetus	September	2020 and 2021	-1	aquatic	breeder	Pandion haliaetus	Osprey
Western Osprey	Pandion haliaetus	October	2019 and 2020	3	aquatic	breeder	Pandion haliaetus	Osprey
Western Osprey	Pandion haliaetus	November	2019 and 2020	1	aquatic	breeder	Pandion haliaetus	Osprey
Western Reef Heron	Egretta gularis	September	2020 and 2021	-9.5	aquatic	breeder	Egretta gularis
Western Reef Heron	Egretta gularis	October	2019 and 2020	2	aquatic	breeder	Egretta gularis
Western Reef Heron	Egretta gularis	November	2019 and 2020	0.3	aquatic	breeder	Egretta gularis
Western Reef Heron	Egretta gularis	December	2019 and 2020	-7.16667	aquatic	breeder	Egretta gularis
Western Yellow Wagtail	Motacilla flava	May	2020 and 2021	7	terrestrial	nonbreeder	Motacilla flava
Western Yellow Wagtail	Motacilla flava	September	2020 and 2021	8.78571	terrestrial	nonbreeder	Motacilla flava
Western Yellow Wagtail	Motacilla flava	October	2019 and 2020	1	terrestrial	nonbreeder	Motacilla flava
Western Yellow Wagtail	Motacilla flava	November	2019 and 2020	-1	terrestrial	nonbreeder	Motacilla flava
Western Yellow Wagtail	Motacilla flava	December	2019 and 2020	-12.1111	terrestrial	nonbreeder	Motacilla flava
White wagtail	Motacilla alba	September	2020 and 2021	-0.5	terrestrial	nonbreeder	Motacilla alba
White wagtail	Motacilla alba	October	2019 and 2020	-3.5	terrestrial	nonbreeder	Motacilla alba
White wagtail	Motacilla alba	November	2019 and 2020	2.28571	terrestrial	nonbreeder	Motacilla alba
White wagtail	Motacilla alba	December	2019 and 2020	-1.46154	terrestrial	nonbreeder	Motacilla alba
White-eared Bulbul	Pycnonotus leucotis	June	2020 and 2021	4	terrestrial	breeder	Pycnonotus leucotis
White-eared Bulbul	Pycnonotus leucotis	September	2020 and 2021	-0.5	terrestrial	breeder	Pycnonotus leucotis
White-eared Bulbul	Pycnonotus leucotis	October	2019 and 2020	-1	terrestrial	breeder	Pycnonotus leucotis
White-eared Bulbul	Pycnonotus leucotis	December	2019 and 2020	-1	terrestrial	breeder	Pycnonotus leucotis
Wood Sandpiper	Tringa glareola	September	2020 and 2021	2.28571	aquatic	nonbreeder	Tringa glareola
Wood Sandpiper	Tringa glareola	December	2019 and 2020	0	aquatic	nonbreeder	Tringa glareola

## Sheet: TableS4
Table S4: Additional species observed infrequently enough that they were not included in the comparison of abundances
Common name	Latin name (IOC 11.2)	N observed	Date observed
Common Kestrel	Falco tinnunculus	1	2019-10-16
Common Kingfisher	Alcedo atthis	1	2020-09-16
Common Pochard	Aythya ferina	1	2020-11-06
Glossy Ibis	Plegadis falcinellus	30	2021-09-16
Greater Sand Plover	Charadrius leschenaultii	6	2019-12-05
Little Bittern	Ixobrychus minutus	1	2021-09-17
Little Owl	Athene noctua	10	several days
Northern Wheatear	Oenanthe oenanthe	1	2021-09-03
Ortolan Bunting	Emberiza hortulana	1	2021-09-11
Siberian Stonechat	Saxicola maurus	1	2021-03-02
Steppe Eagle	Aquila nipalensis	1	2020-11-06
Western Cattle Egret	Bubulcus ibis	1	2019-10-10
White-winged Tern	Chlidonias leucopterus	2	2020-12-14

## Sheet: TableS5
Table S5: Number of individuals and changes in abundance, comparing averages from September 2020 and September 2021, for three different TSE ponds. Data support Figure 8 in the main text. Latin names from the IOC 11.2 are considered the correct name; names used in the phylogeny of BirdTree.org are also provided for convenience.
Common name	Latin Name (IOC 11.2)	Pond	Average count in 2020	Average count in 2021	Difference in abundance (2021-2020)	Habitat type	breeding	Latin name (BirdTree.org)	Older common name used in some data files
African Swamphen	Porphyrio madagascariensis	TSE1	2.33333	2.25	-0.0833333	aquatic	breeder	Porphyrio porphyrio
African Swamphen	Porphyrio madagascariensis	TSE3	0	3	3	aquatic	breeder	Porphyrio porphyrio
Barn Swallow	Hirundo rustica	TSE1	10	12	2	terrestrial	nonbreeder	Hirundo rustica
Barn Swallow	Hirundo rustica	TSE2	3	0	-3	terrestrial	nonbreeder	Hirundo rustica
Barn Swallow	Hirundo rustica	TSE3	2	2	0	terrestrial	nonbreeder	Hirundo rustica
Black-crowned Night Heron	Nycticorax nycticorax	TSE1	0	1.66667	1.66667	aquatic	breeder	Nycticorax nycticorax
Black-crowned Night Heron	Nycticorax nycticorax	TSE2	0	1	1	aquatic	breeder	Nycticorax nycticorax
Black-crowned Night Heron	Nycticorax nycticorax	TSE3	0	1.66667	1.66667	aquatic	breeder	Nycticorax nycticorax
Black-crowned Sparrow-lark	Eremopterix nigriceps	TSE1	3.5	0	-3.5	terrestrial	breeder	Eremopterix nigriceps
Black-crowned Sparrow-lark	Eremopterix nigriceps	TSE2	1	0	-1	terrestrial	breeder	Eremopterix nigriceps
Black-crowned Sparrow-lark	Eremopterix nigriceps	TSE3	0	6	6	terrestrial	breeder	Eremopterix nigriceps
Black-necked Grebe	Podiceps nigricollis	TSE1	0	1	1	aquatic	breeder	Podiceps nigricollis
Black-necked Grebe	Podiceps nigricollis	TSE3	0	1	1	aquatic	breeder	Podiceps nigricollis
Black-winged Stilt	Himantopus himantopus	TSE1	37.6667	3.75	-33.9167	aquatic	breeder	Himantopus himantopus
Black-winged Stilt	Himantopus himantopus	TSE2	48	1	-47	aquatic	breeder	Himantopus himantopus
Black-winged Stilt	Himantopus himantopus	TSE3	41.5	16.875	-24.625	aquatic	breeder	Himantopus himantopus
Caspian Tern	Hydroprogne caspia	TSE3	0	1	1	aquatic	breeder	Sterna caspia
Clamorous reed warbler	Acrocephalus stentoreus	TSE1	3.33333	1	-2.33333	aquatic	breeder	Acrocephalus stentoreus
Common Greenshank	Tringa nebularia	TSE1	1.66667	0	-1.66667	aquatic	nonbreeder	Tringa nebularia
Common Greenshank	Tringa nebularia	TSE3	3	0	-3	aquatic	nonbreeder	Tringa nebularia
Common Moorhen	Gallinula chloropus	TSE1	10	39.875	29.875	aquatic	breeder	Gallinula chloropus	Eurasian Moorhen
Common Moorhen	Gallinula chloropus	TSE2	1	19.1667	18.1667	aquatic	breeder	Gallinula chloropus	Eurasian Moorhen
Common Moorhen	Gallinula chloropus	TSE3	0	16.7143	16.7143	aquatic	breeder	Gallinula chloropus	Eurasian Moorhen
Common Redshank	Tringa totanus	TSE1	1	0	-1	aquatic	nonbreeder	Tringa totanus
Common Redshank	Tringa totanus	TSE3	2	0	-2	aquatic	nonbreeder	Tringa totanus
Common Ringed Plover	Charadrius hiaticula	TSE1	2	0	-2	aquatic	nonbreeder	Charadrius hiaticula
Common Ringed Plover	Charadrius hiaticula	TSE2	3.5	0	-3.5	aquatic	nonbreeder	Charadrius hiaticula
Common Ringed Plover	Charadrius hiaticula	TSE3	9	2.33333	-6.66667	aquatic	nonbreeder	Charadrius hiaticula
Common Sandpiper	Actitis hypoleucos	TSE1	1	0	-1	aquatic	nonbreeder	Actitis hypoleucos
Common Sandpiper	Actitis hypoleucos	TSE2	9.16667	1.5	-7.66667	aquatic	nonbreeder	Actitis hypoleucos
Common Sandpiper	Actitis hypoleucos	TSE3	0	3.71429	3.71429	aquatic	nonbreeder	Actitis hypoleucos
Common Snipe	Gallinago gallinago	TSE1	1.6	1	-0.6	aquatic	nonbreeder	Gallinago gallinago
Common Snipe	Gallinago gallinago	TSE3	2	1	-1	aquatic	nonbreeder	Gallinago gallinago
Common Tern	Sterna hirundo	TSE1	0	1	1	aquatic	nonbreeder	Sterna hirundo
Crested Lark	Galerida cristata	TSE1	6	0	-6	terrestrial	breeder	Galerida cristata
Crested Lark	Galerida cristata	TSE2	3	0	-3	terrestrial	breeder	Galerida cristata
Crested Lark	Galerida cristata	TSE3	1	2.5	1.5	terrestrial	breeder	Galerida cristata
Curlew Sandpiper	Calidris ferruginea	TSE1	23.5	0	-23.5	aquatic	nonbreeder	Calidris ferruginea
Curlew Sandpiper	Calidris ferruginea	TSE2	16.25	0	-16.25	aquatic	nonbreeder	Calidris ferruginea
Curlew Sandpiper	Calidris ferruginea	TSE3	12.5	1	-11.5	aquatic	nonbreeder	Calidris ferruginea
Dunlin	Calidris alpina	TSE1	3.33333	0	-3.33333	aquatic	nonbreeder	Calidris alpina
Dunlin	Calidris alpina	TSE3	38.25	2.5	-35.75	aquatic	nonbreeder	Calidris alpina
Eastern Black-eared Wheatear	Oenanthe melanoleuca	TSE1	10	0	-10	terrestrial	nonbreeder	Oenanthe hispanica	Black eared Wheatear
Eastern Black-eared Wheatear	Oenanthe melanoleuca	TSE2	4	0	-4	terrestrial	nonbreeder	Oenanthe hispanica	Black eared Wheatear
Eastern Black-eared Wheatear	Oenanthe melanoleuca	TSE3	2	1	-1	terrestrial	nonbreeder	Oenanthe hispanica	Black eared Wheatear
Eurasian Collared Dove	Streptopelia decaocto	TSE1	21.1667	5	-16.1667	terrestrial	breeder	Streptopelia decaocto
Eurasian Collared Dove	Streptopelia decaocto	TSE2	17.6667	2	-15.6667	terrestrial	breeder	Streptopelia decaocto
Eurasian Collared Dove	Streptopelia decaocto	TSE3	0	7	7	terrestrial	breeder	Streptopelia decaocto
Eurasian Coot	Fulica atra	TSE1	0	29.125	29.125	aquatic	breeder	Fulica atra
Eurasian Coot	Fulica atra	TSE2	0	12.5	12.5	aquatic	breeder	Fulica atra
Eurasian Coot	Fulica atra	TSE3	0	58	58	aquatic	breeder	Fulica atra
Eurasian Curlew	Numenius arquata	TSE3	0	1.5	1.5	aquatic	nonbreeder	Numenius arquata
Eurasian Hoopoe	Upupa epops	TSE1	1	3.5	2.5	terrestrial	nonbreeder	Upupa epops
Eurasian Hoopoe	Upupa epops	TSE2	0	1	1	terrestrial	nonbreeder	Upupa epops
Ferruginous Duck	Aythya nyroca	TSE1	0	5	5	aquatic	breeder	Aythya nyroca
Ferruginous Duck	Aythya nyroca	TSE2	0	1	1	aquatic	breeder	Aythya nyroca
Garganey	Spatula querquedula	TSE1	1.5	1	-0.5	aquatic	nonbreeder	Anas querquedula
Garganey	Spatula querquedula	TSE3	8	1	-7	aquatic	nonbreeder	Anas querquedula
Great Cormorant	Phalacrocorax carbo	TSE1	0	4.125	4.125	aquatic	nonbreeder	Phalacrocorax carbo
Great Cormorant	Phalacrocorax carbo	TSE2	0	1	1	aquatic	nonbreeder	Phalacrocorax carbo
Great Cormorant	Phalacrocorax carbo	TSE3	0	1	1	aquatic	nonbreeder	Phalacrocorax carbo
Great crested Grebe	Podiceps cristatus	TSE1	13	15.7143	2.71429	aquatic	breeder	Podiceps cristatus
Great crested Grebe	Podiceps cristatus	TSE2	46.8333	54.25	7.41667	aquatic	breeder	Podiceps cristatus
Great crested Grebe	Podiceps cristatus	TSE3	0	33.2857	33.2857	aquatic	breeder	Podiceps cristatus
Great Grey Shrike	Lanius excubitor	TSE1	2	1	-1	terrestrial	breeder	Lanius excubitor	Grey shrike
Great Grey Shrike	Lanius excubitor	TSE2	1	1	0	terrestrial	breeder	Lanius excubitor	Grey shrike
Great Grey Shrike	Lanius excubitor	TSE3	0	1	1	terrestrial	breeder	Lanius excubitor	Grey shrike
Greater Hoopoe-lark	Alaemon alaudipes	TSE3	0	1	1	terrestrial	breeder	Alaemon alaudipes
Green Sandpiper	Tringa ochropus	TSE1	1	1	0	aquatic	nonbreeder	Tringa ochropus
Green Sandpiper	Tringa ochropus	TSE2	1.5	0	-1.5	aquatic	nonbreeder	Tringa ochropus
Green Sandpiper	Tringa ochropus	TSE3	0	2	2	aquatic	nonbreeder	Tringa ochropus
Grey Francolin	Ortygornis pondicerianus	TSE1	2.66667	0	-2.66667	terrestrial	breeder	Francolinus pondicerianus
Grey Heron	Ardea cinerea	TSE1	16	4.25	-11.75	aquatic	nonbreeder	Ardea cinerea
Grey Heron	Ardea cinerea	TSE3	0	2.5	2.5	aquatic	nonbreeder	Ardea cinerea
House Sparrow	Passer domesticus	TSE1	0	1	1	terrestrial	breeder	Passer domesticus
House Sparrow	Passer domesticus	TSE3	0	2	2	terrestrial	breeder	Passer domesticus
Kentish Plover	Charadrius alexandrinus	TSE1	6	0	-6	aquatic	breeder	Charadrius alexandrinus
Kentish Plover	Charadrius alexandrinus	TSE2	3.6	0	-3.6	aquatic	breeder	Charadrius alexandrinus
Kentish Plover	Charadrius alexandrinus	TSE3	6.75	4.625	-2.125	aquatic	breeder	Charadrius alexandrinus
Laughing Dove	Spilopelia senegalensis	TSE1	2	3.5	1.5	terrestrial	breeder	Stigmatopelia senegalensis
Laughing Dove	Spilopelia senegalensis	TSE2	3.25	1	-2.25	terrestrial	breeder	Stigmatopelia senegalensis
Laughing Dove	Spilopelia senegalensis	TSE3	1	3.4	2.4	terrestrial	breeder	Stigmatopelia senegalensis
Lesser Black-backed Gull	Larus fuscus	TSE2	1	0	-1	aquatic	nonbreeder	Larus fuscus
Lesser crested tern	Thalasseus bengalensis	TSE1	1	0	-1	aquatic	nonbreeder	Sterna bengalensis
Little Egret	Egretta garzetta	TSE1	11	3.83333	-7.16667	aquatic	nonbreeder	Egretta garzetta
Little Egret	Egretta garzetta	TSE2	9.33333	4	-5.33333	aquatic	nonbreeder	Egretta garzetta
Little Egret	Egretta garzetta	TSE3	12	5.83333	-6.16667	aquatic	nonbreeder	Egretta garzetta
Little Grebe	Tachybaptus ruficollis	TSE1	9.5	31.25	21.75	aquatic	breeder	Tachybaptus ruficollis
Little Grebe	Tachybaptus ruficollis	TSE2	3.8	20.2857	16.4857	aquatic	breeder	Tachybaptus ruficollis
Little Grebe	Tachybaptus ruficollis	TSE3	0	109.5	109.5	aquatic	breeder	Tachybaptus ruficollis
Little Ringed Plover	Charadrius dubius	TSE2	1	0	-1	terrestrial	breeder	Charadrius dubius
Little Ringed Plover	Charadrius dubius	TSE3	0	2	2	terrestrial	breeder	Charadrius dubius
Little Stint	Calidris minuta	TSE1	15.5	1	-14.5	aquatic	nonbreeder	Calidris minuta
Little Stint	Calidris minuta	TSE2	12	1	-11	aquatic	nonbreeder	Calidris minuta
Little Stint	Calidris minuta	TSE3	15.5	20.75	5.25	aquatic	nonbreeder	Calidris minuta
Little Tern	Sternula albifrons	TSE2	4	0	-4	aquatic	nonbreeder	Sterna albifrons
Mallard	Anas platyrhynchos	TSE1	0	1	1	aquatic	nonbreeder	Anas platyrhynchos
Marsh Sandpiper	Tringa stagnatilis	TSE1	1.5	0	-1.5	aquatic	nonbreeder	Tringa stagnatilis
Marsh Sandpiper	Tringa stagnatilis	TSE3	1	1.66667	0.666667	aquatic	nonbreeder	Tringa stagnatilis
Namaqua Dove	Oena capensis	TSE1	3.66667	1	-2.66667	terrestrial	breeder	Oena capensis
Namaqua Dove	Oena capensis	TSE2	6.66667	0	-6.66667	terrestrial	breeder	Oena capensis
Namaqua Dove	Oena capensis	TSE3	1.5	1	-0.5	terrestrial	breeder	Oena capensis
Northern Shoveler	Spatula clypeata	TSE1	1	1	0	aquatic	nonbreeder	Anas clypeata
Northern Shoveler	Spatula clypeata	TSE3	2	0	-2	aquatic	nonbreeder	Anas clypeata
Pied Avocet	Recurvirostra avosetta	TSE2	3	0	-3	aquatic	breeder	Recurvirostra avosetta
Purple Heron	Ardea purpurea	TSE1	1.5	2	0.5	aquatic	breeder	Ardea purpurea
Purple Heron	Ardea purpurea	TSE2	1.5	0	-1.5	aquatic	breeder	Ardea purpurea
Red-necked Phalarope	Phalaropus lobatus	TSE1	3	0	-3	aquatic	nonbreeder	Phalaropus lobatus
Red-necked Phalarope	Phalaropus lobatus	TSE2	1	0	-1	aquatic	nonbreeder	Phalaropus lobatus
Red-necked Phalarope	Phalaropus lobatus	TSE3	0	1	1	aquatic	nonbreeder	Phalaropus lobatus
Red-tailed Shrike	Lanius phoenicuroides	TSE2	1	0	-1	terrestrial	nonbreeder	Lanius isabellinus
Red-wattled Lapwing	Vanellus indicus	TSE1	2.75	0	-2.75	aquatic	breeder	Vanellus indicus
Red-wattled Lapwing	Vanellus indicus	TSE2	3.5	0	-3.5	aquatic	breeder	Vanellus indicus
Red-wattled Lapwing	Vanellus indicus	TSE3	0	2.66667	2.66667	aquatic	breeder	Vanellus indicus
Rock Dove	Columba livia	TSE1	3	0	-3	generalist	breeder	Columba livia
Rock Dove	Columba livia	TSE2	2.4	0	-2.4	generalist	breeder	Columba livia
Rock Dove	Columba livia	TSE3	4	1	-3	generalist	breeder	Columba livia
Ruff	Calidris pugnax	TSE1	1	0	-1	aquatic	nonbreeder	Philomachus pugnax
Ruff	Calidris pugnax	TSE3	1	1.66667	0.666667	aquatic	nonbreeder	Philomachus pugnax
Sand Martin	Riparia riparia	TSE1	14.3333	23.375	9.04167	terrestrial	nonbreeder	Riparia riparia
Sand Martin	Riparia riparia	TSE2	3.5	9.16667	5.66667	terrestrial	nonbreeder	Riparia riparia
Sand Martin	Riparia riparia	TSE3	5.5	9.33333	3.83333	terrestrial	nonbreeder	Riparia riparia
Saunders's Tern	Sternula saundersi	TSE2	0	1	1	aquatic	breeder	Sterna saundersi
Saunders's Tern	Sternula saundersi	TSE3	0	12	12	aquatic	breeder	Sterna saundersi
Slender-billed Gull	Chroicocephalus genei	TSE1	5	0	-5	aquatic	nonbreeder	Larus genei
Slender-billed Gull	Chroicocephalus genei	TSE2	106	0	-106	aquatic	nonbreeder	Larus genei
Socotra Cormorant	Phalacrocorax nigrogularis	TSE1	0	1	1	aquatic	breeder	Phalacrocorax nigrogularis
Spotted Flycatcher	Muscicapa striata	TSE1	1	1	0	terrestrial	nonbreeder	Muscicapa striata
Spotted Flycatcher	Muscicapa striata	TSE3	0	1	1	terrestrial	nonbreeder	Muscicapa striata
Squacco Heron	Ardeola ralloides	TSE1	1.33333	1	-0.333333	aquatic	breeder	Ardeola ralloides
Squacco Heron	Ardeola ralloides	TSE2	1	2.5	1.5	aquatic	breeder	Ardeola ralloides
Squacco Heron	Ardeola ralloides	TSE3	0	1.83333	1.83333	aquatic	breeder	Ardeola ralloides
Temminck's Stint	Calidris temminckii	TSE2	2	0	-2	aquatic	nonbreeder	Calidris temminckii
Temminck's Stint	Calidris temminckii	TSE3	1	0	-1	aquatic	nonbreeder	Calidris temminckii
Western Marsh Harrier	Circus aeruginosus	TSE1	2	1.33333	-0.666667	terrestrial	nonbreeder	Circus aeruginosus	Eurasian Marsh Harrier
Western Marsh Harrier	Circus aeruginosus	TSE2	1	2	1	terrestrial	nonbreeder	Circus aeruginosus	Eurasian Marsh Harrier
Western Marsh Harrier	Circus aeruginosus	TSE3	0	1.33333	1.33333	terrestrial	nonbreeder	Circus aeruginosus	Eurasian Marsh Harrier
Western Osprey	Pandion haliaetus	TSE3	1	0	-1	aquatic	breeder	Pandion haliaetus	Osprey
Western Reef Heron	Egretta gularis	TSE1	15	2	-13	aquatic	breeder	Egretta gularis
Western Reef Heron	Egretta gularis	TSE2	5.33333	0	-5.33333	aquatic	breeder	Egretta gularis
Western Reef Heron	Egretta gularis	TSE3	17	3.5	-13.5	aquatic	breeder	Egretta gularis
Western Yellow Wagtail	Motacilla flava	TSE1	1	0	-1	terrestrial	nonbreeder	Motacilla flava
Western Yellow Wagtail	Motacilla flava	TSE2	6.25	2	-4.25	terrestrial	nonbreeder	Motacilla flava
Western Yellow Wagtail	Motacilla flava	TSE3	2.75	14	11.25	terrestrial	nonbreeder	Motacilla flava
White wagtail	Motacilla alba	TSE2	1.5	0	-1.5	terrestrial	nonbreeder	Motacilla alba
White wagtail	Motacilla alba	TSE3	0	1	1	terrestrial	nonbreeder	Motacilla alba
White-eared Bulbul	Pycnonotus leucotis	TSE1	1	1	0	terrestrial	breeder	Pycnonotus leucotis
White-eared Bulbul	Pycnonotus leucotis	TSE2	2	0	-2	terrestrial	breeder	Pycnonotus leucotis
White-eared Bulbul	Pycnonotus leucotis	TSE3	0	1	1	terrestrial	breeder	Pycnonotus leucotis
Wood Sandpiper	Tringa glareola	TSE1	2	0	-2	aquatic	nonbreeder	Tringa glareola
Wood Sandpiper	Tringa glareola	TSE2	1.5	0	-1.5	aquatic	nonbreeder	Tringa glareola
Wood Sandpiper	Tringa glareola	TSE3	1	4	3	aquatic	nonbreeder	Tringa glareola
